# Supplementary material for: The utility of G8 screening for clinical practice of chemotherapy in older patients with gastrointestinal cancer
Source: Research Square preprint supplement (doi:10.21203/rs.3.rs-1519232/v1), 2022-04-15
Supplement: Supplementary file 1 [file 156223b8dced41774a8b4fda.docx]

Supplementary Table S1. Rate of G8 score for each item between patients with and without chemotherapy

| Items | All  (n=207), n (%) | CT  (n=143), n (%) | Non-CT  (n=64), n (%) | *p* |
| --- | --- | --- | --- | --- |
| Food intake |  |  |  | 0.0719 |
| 0 | 35 (17) | 17 (12) | 18 (28) |  |
| 1 | 81 (39) | 61 (42) | 20 (31) |  |
| 2 | 91 (44) | 66 (46) | 26 (41) |  |
| Weight loss |  |  |  | 0.1436 |
| 0 | 96 (46) | 63 (44) | 33 (52) |  |
| 1 | 11 (5) | 6 (4) | 5 (8) |  |
| 2 | 49 (24) | 36 (25) | 13 (20) |  |
| 3 | 51 (25) | 39 (27) | 13 (20) |  |
| Mobility |  |  |  | <0.0001 |
| 0 | 1 (0) | 0 (0) | 1 (2) |  |
| 1 | 28 (14) | 7 (5) | 21 (33) |  |
| 2 | 178 (86) | 137 (95) | 42 (66) |  |
| Neuropsychological problem |  |  |  | 0.0005 |
| 0 | 1 (0) | 0 (0) | 1 (2) |  |
| 1 | 11 (5) | 3 (2) | 8 (13) |  |
| 2 | 195 (94) | 141 (98) | 55 (86) |  |
| Body mass index |  |  |  | 0.0792 |
| 0 | 61 (29) | 38 (12) | 23 (36) |  |
| 1 | 52 (25) | 33 (42) | 20 (31) |  |
| 2 | 44 (21) | 37 (46) | 7 (11) |  |
| 3 | 50 (24) | 36 (46) | 14 (22) |  |
| Prescription drug |  |  |  | 0.2660 |
| 0 | 131 (63) | 86 (60) | 45 (70) |  |
| 1 | 76 (37) | 58 (40) | 19 (30) |  |
| Self-perception of health |  |  |  | 0.0856 |
| 0 | 77 (37) | 47 (33) | 30 (47) |  |
| 0.5 | 60 (29) | 49 (34) | 11 (17) |  |
| 1 | 43 (21) | 29 (20) | 15 (23) |  |
| 2 | 27 (13) | 19 (13) | 8 (13) |  |
| Age |  |  |  | <0.0001 |
| 0 | 11 (5) | 3 (2) | 8 (13) |  |
| 1 | 40 (19) | 16 (11) | 25 (39) |  |
| 2 | 156 (75) | 125 (87) | 31 (48) |  |

G8: geriatric 8, CT: chemotherapy
