# Supplementary material for: The utility of G8 screening for clinical practice of chemotherapy in older patients with gastrointestinal cancer
Source: Research Square preprint supplement (doi:10.21203/rs.3.rs-1519232/v1), 2022-04-15
Supplement: Supplementary file 2 [file 2ee7b93c70f3fd408b0273b4.docx]

**Supplementary Table S2.** Patient characteristics with abnormal G8 score

|  | | All patients (n = 192), n (%) | With CT  (n = 129), n (%) | Without CT (n = 63), n (%) |
| --- | --- | --- | --- | --- |
| Age, year | Median (range) | 75 (65–92) | 73 (65–86) | 80 (66–92) |
| Sex | Male | 100 (52) | 68 (53) | 32 (51) |
|  | Female | 92 (48) | 61 (47) | 31 (49) |
| PS | 0 | 86 (45) | 71 (55) | 15 (24) |
|  | 1 | 86 (45) | 56 (43) | 30 (48) |
|  | ≥2 | 15 (8) | 1 (1) | 14 (22) |
|  | Unknown | 5 (3) | 1 (1) | 4 (6) |
| BMI | Median (range) | 20.3 (13.5–29.3) | 20.7 (13.5–29.3) | 20 (14.8–27.5) |
| Cancer type | Colon/Rectum | 97 (51) | 65 (50) | 32 (51) |
|  | Pancreas | 57 (30) | 38 (29) | 19 (30) |
|  | Stomach | 38 (20) | 26 (20) | 12 (19) |
| G8 score | Median (range) | 10 (2–14) | 10.5 (6–14) | 9 (2–14) |
| IADL | Normal | 94 (49) | 80 (62) | 14 (22) |
|  | Abnormal | 81 (42) | 37 (29) | 44 (70) |
|  | Unknown | 17 (9) | 12 (9) | 5 (8) |
| Living situation | With others together | 148 (77) | 97 (75) | 51 (81) |
|  | Alone | 42 (22) | 32 (25) | 10 (16) |
|  | Nursing home | 2 (1) | 0 (0) | 2 (3) |

G8: geriatric 8, CT: chemotherapy, PS: performance status, BMI: body mass index, IADL: instrumental activities of daily living
